# Supplementary material for: Preventing adverse events during paediatric cancer treatment: protocol for a multi-site hybrid randomised controlled trial of catheter lock solutions (the CLOCK trial)
Source: PubMed Central journal article supplement — BMJ Open. 2024 Jul 9;14(7):e085637. doi: 10.1136/bmjopen-2024-085637 (PMC11243282; doi:10.1136/bmjopen-2024-085637), 2024-07-09
Supplement: bmjopen-14-7-s002.pdf [file bmjopen-14-7-s002.pdf]

**Supplementary Table: Trial registration—data set**

| <b>Data category</b>                                 | <b>Information</b>                                                                                                                                                                                                                                                                                                                                                                                                                                                                                                                                                                                                                                                                                      |
|------------------------------------------------------|---------------------------------------------------------------------------------------------------------------------------------------------------------------------------------------------------------------------------------------------------------------------------------------------------------------------------------------------------------------------------------------------------------------------------------------------------------------------------------------------------------------------------------------------------------------------------------------------------------------------------------------------------------------------------------------------------------|
| <b>Primary registry and trial identifying number</b> | ANZCTR<br>ACTRN12622000499785                                                                                                                                                                                                                                                                                                                                                                                                                                                                                                                                                                                                                                                                           |
| <b>Date of registration in primary registry</b>      | 29/03/2022                                                                                                                                                                                                                                                                                                                                                                                                                                                                                                                                                                                                                                                                                              |
| <b>Secondary identifying numbers</b>                 | NA                                                                                                                                                                                                                                                                                                                                                                                                                                                                                                                                                                                                                                                                                                      |
| <b>Source(s) of monetary or material support</b>     | The University of Queensland                                                                                                                                                                                                                                                                                                                                                                                                                                                                                                                                                                                                                                                                            |
| <b>Primary sponsor</b>                               | The University of Queensland                                                                                                                                                                                                                                                                                                                                                                                                                                                                                                                                                                                                                                                                            |
| <b>Secondary sponsor(s)</b>                          | NA                                                                                                                                                                                                                                                                                                                                                                                                                                                                                                                                                                                                                                                                                                      |
| <b>Contact for public queries</b>                    | a.ullman@uq.edu.au                                                                                                                                                                                                                                                                                                                                                                                                                                                                                                                                                                                                                                                                                      |
| <b>Contact for scientific queries</b>                | a.ullman@uq.edu.au                                                                                                                                                                                                                                                                                                                                                                                                                                                                                                                                                                                                                                                                                      |
| <b>Public title</b>                                  | Preventing adverse events during paediatric cancer treatment: A multi-site hybrid randomised controlled trial of catheter lock solutions (The CLOCK trial) Protocol                                                                                                                                                                                                                                                                                                                                                                                                                                                                                                                                     |
| <b>Scientific title</b>                              | Preventing adverse events during paediatric cancer treatment: A multi-site hybrid randomised controlled trial of catheter lock solutions (The CLOCK trial) Protocol                                                                                                                                                                                                                                                                                                                                                                                                                                                                                                                                     |
| <b>Countries of recruitment</b>                      | Australia and New Zealand                                                                                                                                                                                                                                                                                                                                                                                                                                                                                                                                                                                                                                                                               |
| <b>Health condition(s) or problem(s) studied</b>     | Paediatric cancer                                                                                                                                                                                                                                                                                                                                                                                                                                                                                                                                                                                                                                                                                       |
| <b>Intervention(s)</b>                               | Tetra-ethylenediaminetetraacetic acid (T-EDTA)                                                                                                                                                                                                                                                                                                                                                                                                                                                                                                                                                                                                                                                          |
| <b>Key inclusion and exclusion criteria</b>          | Children (<18 years) with an oncological or malignant haematological condition who have a central vascular access device (CVAD) in situ (including peripherally inserted central catheters [PICCs], tunnelled (cuffed or non-cuffed) [e.g., Hickman®; Becton Dickinson, US] and totally implanted [e.g., PORT-A-CATH®; Smith Medical, US]) will be eligible for inclusion. Exclusion criteria include: end-of-life pathway/measures at recruitment, pre-existing coagulopathic condition not related to current diagnosis or treatment (e.g., Haemophilia A and B or other factor deficiency; Immune Thrombocytopenic Purpura (ITP); Von Willebrand's disease), and known allergy to heparin or T-EDTA. |
| <b>Study type</b>                                    | A two-arm, superiority type 1 hybrid effectiveness-implementation randomised control trial                                                                                                                                                                                                                                                                                                                                                                                                                                                                                                                                                                                                              |
| <b>Date of first enrolment</b>                       |                                                                                                                                                                                                                                                                                                                                                                                                                                                                                                                                                                                                                                                                                                         |
| <b>Target sample size</b>                            | 720 recruitments                                                                                                                                                                                                                                                                                                                                                                                                                                                                                                                                                                                                                                                                                        |
| <b>Recruitment status</b>                            |                                                                                                                                                                                                                                                                                                                                                                                                                                                                                                                                                                                                                                                                                                         |
| <b>Primary outcome(s)</b>                            | Primary outcome for the effectiveness component will be a composite of CVAD-associated bloodstream                                                                                                                                                                                                                                                                                                                                                                                                                                                                                                                                                                                                      |

---

infections (CABSI), CVAD-associated thrombosis or CVAD occlusion during CVAD dwell or at removal.

---

**Key secondary outcomes** Secondary outcomes will include CABSI, Centre for Disease Control and Prevention - National Healthcare Safety Network (CDC-NHSN) CABSI only, CVAD-associated-thrombosis, CVAD failure, incidental asymptomatic CVAD-associated-thrombosis, other adverse events, health related health-related quality of life, healthcare costs, and mortality.

---
